# Supplementary material for: The evolution of photosynthesis in chromist algae through serial endosymbioses
Source: Nat Commun. 2014 Dec 10;5:5764. doi: 10.1038/ncomms6764 (PMC4284659; doi:10.1038/ncomms6764)
Supplement: Supplementary Information — Supplementary Figures 1-2, Supplementary Tables 1-2, and Supplementary References [file ncomms6764-s1.pdf]

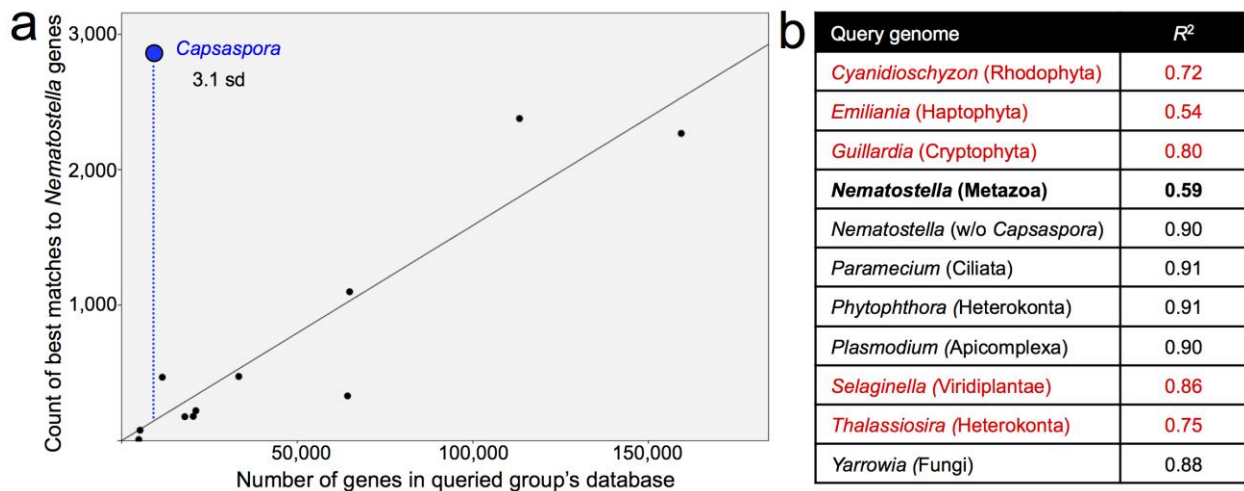

**Supplementary Figure 1.** Examples and summary of strong relationships between genome similarity and database size. **(a)** Example of the linear regressions run on representatives of 14 major eukaryotic lineages, using group database size (in number of protein-encoding genes) as the independent variable, and the number of top matches to the query genome as the dependent variable. The plot shown is for *Nematostella vectensis*, chosen because it is average-sized among metazoan genomes. The relationship is significant ( $P = 0.002$ ) with a relatively high coefficient of determination ( $R^2 = 0.59$ ); however, *Capsaspora owczarzaki*, recognized as the closest protistan relative to metazoans + choanoflagellates<sup>1</sup>, is identified as a significant positive outlier (studentized residual  $> 3$ ) and substantially reduces the model's goodness-of-fit. When *Capsaspora* is removed from the analysis, the model fit increases substantially ( $R^2 = 0.92$ ). This example demonstrates how regressions can be used to model the predicted similarity of a given genome to those from diverse taxa, and to identify lineages that are significantly more similar than expected. In this case, the similarity is due to an established genealogical relationship, which is recovered strongly in phylogenetic analyses. In the absence of such a clear relationship, significant regression outliers can result from EGT as indicted by the lower  $R^2$  value for the regression analysis of the haptophyte, *Emiliana huxleyi*, which is fully described in Fig. 1 of the main text. **(b)** Summary of coefficients of determination for comparable regressions performed on BLAST results from representatives of diverse eukaryotic taxa. All regressions were highly significant at  $P < 0.001$  and with high  $R^2$  values, except for the *Nematostella* example highlighted above, with *Capsaspora* included as a target taxon ( $P = 0.002$ ). Coefficients of determination tended to be lower for genomes of all photosynthetic organisms (shown in red), likely reflecting general impacts of shared genes from EGT among all photosynthetic groups present.

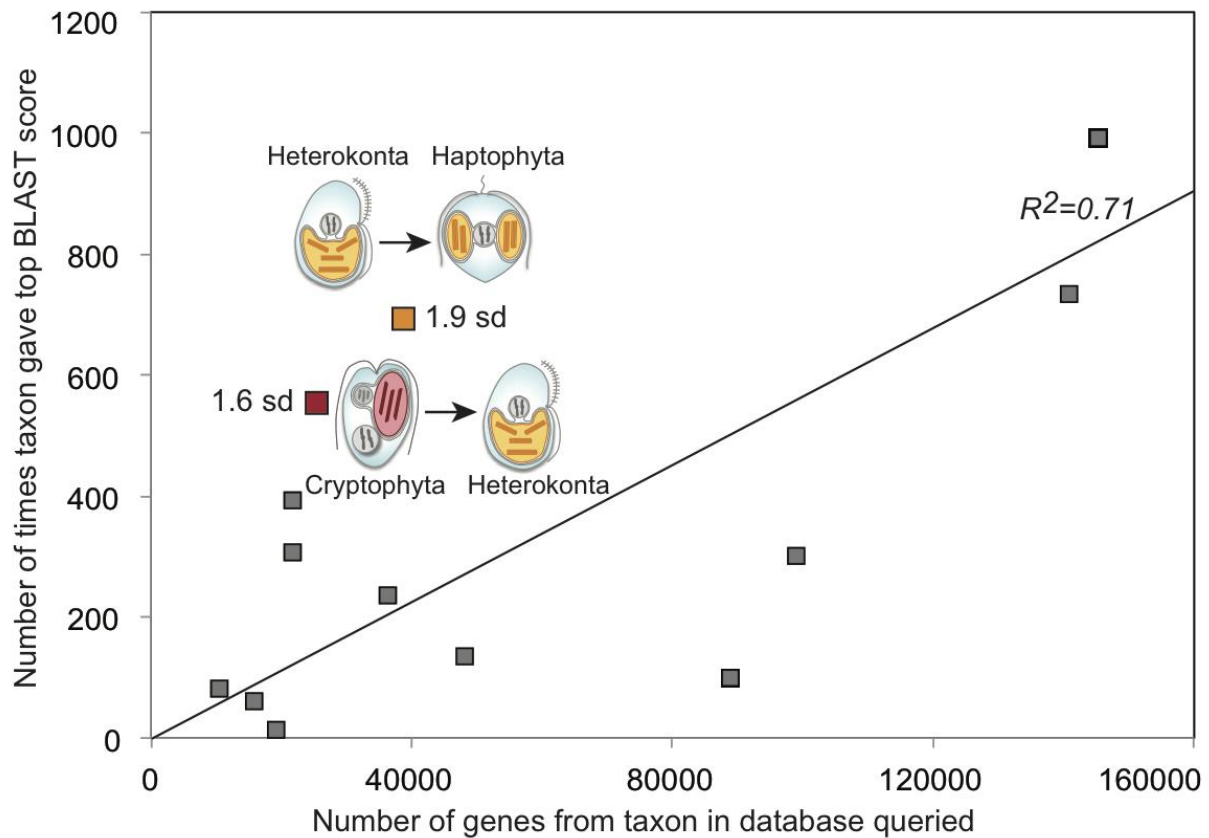

**Supplementary Figure 2.** Linear regressions on relationships between the number of most similar sequences (measured as top BLAST matches) from 13 other eukaryotic lineages to all inferred protein encoding genes in the ochrophyte (*Phaeodactylum tricornutum*) genome. The largest outliers are highlighted by colored data points, studentized residuals (s.d.), and an image for the direction of gene transfer predicted by our evolutionary model of serial endosymbioses. Although the cryptophyte and haptophyte genomes are the two largest outliers from values predicted by the regression model, in neither case is the studentized residual significant. This result is consistent with our model that ochrophytes have an endosymbiotic history with both of the other chromist algae, meaning signals from genes indicating an endosymbiotic association are predicted to be split between haptophytes and cryptophytes.

**Supplementary Table 1.** Number of top matches and studentized residuals from BLAST searches using haptophyte (*Emiliana*), cryptophyte (*Guillardia*) and ochrophyte (*Phaeodactylum*) genomes as queries. SRE = studentized residual error. Yellow shaded boxes indicate results that suggest a directional model of endosymbioses, which are highlighted in regressions shown in Fig. 1 and Supplemental Fig. 2. Heterokonts show a greater than expected similarity to both haptophytes and cryptophytes when the latter two are used as individual queries. This suggests an endosymbiotic association of heterokonts with both taxa. The reciprocal results, using an ochrophyte as the query genome, effectively splits the signal from EGT between the cryptophyte and haptophyte target genomes. In contrast, there is no indication of EGT between cryptophytes and haptophytes when either genome is used as the BLAST query.

| Target group                      | Database size | Query genome    |      |                   |      |                      |      |
|-----------------------------------|---------------|-----------------|------|-------------------|------|----------------------|------|
|                                   |               | <i>Emiliana</i> |      | <i>Guillardia</i> |      | <i>Phaeodactylum</i> |      |
|                                   |               | Top hits        | SRE  | Top hits          | SRE  | Top hits             | SRE  |
| Viridiplantae                     | 145189        | 1861            | -0.1 | 1778              | 0.9  | 993                  | 1.0  |
| Metazoa<br>+ <i>Capsospora</i>    | 140718        | 1482            | -0.5 | 1383              | -0.1 | 733                  | -0.2 |
| Fungi                             | 99042         | 451             | -1.0 | 411               | -1.6 | 302                  | -1.0 |
| Ciliata                           | 88824         | 180             | -1.1 | 322               | -1.5 | 98                   | -1.6 |
| Heterokonta                       | 86590         | 4093            | 3.2  | 1656              | 2.1  |                      |      |
| Apicomplexa<br>+ <i>Perkinsus</i> | 48025         | 164             | -0.5 | 136               | -0.9 | 136                  | -0.5 |
| Haptophyta                        | 39125         |                 |      | 468               | 0.2  | 689                  | 1.9  |
| Amoebozoa                         | 36451         | 583             | 0.1  | 560               | 0.5  | 237                  | 0.2  |
| Cryptophyta                       | 25472         | 1011            | 0.7  |                   |      | 557                  | 1.6  |
| Rhodophyta                        | 21770         | 297             | 0.0  | 735               | 1.3  | 307                  | 0.7  |
| Rhizaria                          | 21708         | 716             | 0.4  | 397               | 0.4  | 393                  | 1.1  |
| Euglenozoa                        | 19253         | 38              | -0.2 | 22                | -0.4 | 12                   | -0.4 |
| Heterolobosea                     | 15753         | 93              | -0.1 | 137               | -0.1 | 60                   | -0.1 |
| Apusozoa                          | 10627         | 207             | 0.1  | 188               | 0.2  | 83                   | 0.1  |

**Supplementary table 2.** Organisms included in this investigation, grouped into major eukaryotic lineages targeted in BLAST searches. Sizes of protein-encoding data sets are shown for each complete genome, along with total numbers of sequences present for each of the major lineages.

| Major taxa and species                         | Genome size | Source for data                                                                     | Major taxa and species                 | Genome size | Source for data                                                                         |
|------------------------------------------------|-------------|-------------------------------------------------------------------------------------|----------------------------------------|-------------|-----------------------------------------------------------------------------------------|
| <b>Amoebozoa (3)</b>                           |             |                                                                                     | <b>Heterolobosea</b>                   |             |                                                                                         |
| <i>Entamoeba histolytica</i>                   | 8,163       | <a href="http://www.ncbi.nlm.nih.gov/">http://www.ncbi.nlm.nih.gov/</a>             | <i>Naegleria gruberi</i>               | 15,753      | <a href="http://genome.jgi-psf.org/">http://genome.jgi-psf.org/</a>                     |
| <i>Dictyostelium discoideum</i>                | 13,315      | <a href="http://www.ncbi.nlm.nih.gov/">http://www.ncbi.nlm.nih.gov/</a>             | <b>Metazoa + protist relatives (7)</b> |             |                                                                                         |
| <i>Acanthamoeba castellanii</i>                | 14,974      | <a href="http://www.ncbi.nlm.nih.gov/">http://www.ncbi.nlm.nih.gov/</a>             | <i>Homo sapiens</i>                    | 33,615      | <a href="http://www.ncbi.nlm.nih.gov/">http://www.ncbi.nlm.nih.gov/</a>                 |
| Total:                                         | 36,452      |                                                                                     | <i>Drosophila melanogaster</i>         | 19,789      | Metazome v3.0                                                                           |
| <b>Apicomplexans plus Perkinsus (5)</b>        |             |                                                                                     | <i>Caenorhabditis elegans</i>          | 25,816      | <a href="http://www.ncbi.nlm.nih.gov/">http://www.ncbi.nlm.nih.gov/</a>                 |
| <i>Toxoplasma gondii</i>                       | 8,103       | <a href="http://toxodb.org/">http://toxodb.org/</a>                                 | <i>Nematostella vectensis</i>          | 24,780      | <a href="http://www.ncbi.nlm.nih.gov/">http://www.ncbi.nlm.nih.gov/</a>                 |
| <i>Plasmodium falciparum</i>                   | 5,337       | <a href="http://www.ncbi.nlm.nih.gov/">http://www.ncbi.nlm.nih.gov/</a>             | <i>Monosiga brevicollis</i>            | 9,196       | <a href="http://genome.jgi-psf.org/">http://genome.jgi-psf.org/</a>                     |
| <i>Neospora caninum</i>                        | 7,122       | <a href="http://toxodb.org/">http://toxodb.org/</a>                                 | <i>Capsaspora owczarzaki</i>           | 8,792       | <a href="http://www.broadinstitute.org/">http://www.broadinstitute.org/</a>             |
| <i>Cryptosporidium parvum</i>                  | 3,805       | <a href="http://cryptodb.org/">http://cryptodb.org/</a>                             | <i>Sphaeroforma arctica</i>            | 18,730      | <a href="http://www.broadinstitute.org/">http://www.broadinstitute.org/</a>             |
| <i>Perkinsus marinus</i>                       | 23,658      | <a href="http://www.ncbi.nlm.nih.gov/">http://www.ncbi.nlm.nih.gov/</a>             | Total:                                 | 140,718     |                                                                                         |
| Total:                                         | 48,025      |                                                                                     | <b>Rhizaria</b>                        |             |                                                                                         |
| <b>Apusozoa</b>                                |             |                                                                                     | <i>Bigelowiella natans</i>             | 21,708      | <a href="http://genome.jgi-psf.org/">http://genome.jgi-psf.org/</a>                     |
| <i>Thecamonas trahens</i>                      | 10,627      | <a href="http://www.broadinstitute.org/">http://www.broadinstitute.org/</a>         | <b>Rhodophyta (3)</b>                  |             |                                                                                         |
| <b>Ciliates (3)</b>                            |             |                                                                                     | <i>Cyanidioschyzon merolae</i>         | 5,016       | <a href="http://merolae.biol.s.u-tokyo.ac.jp/">http://merolae.biol.s.u-tokyo.ac.jp/</a> |
| <i>Paramecium tetraurelia</i>                  | 39,521      | <a href="http://paramecium.cgm.cnrs-gif.fr/">http://paramecium.cgm.cnrs-gif.fr/</a> | <i>Chondrus crispus</i>                | 9,580       | <a href="http://www.ncbi.nlm.nih.gov/">http://www.ncbi.nlm.nih.gov/</a>                 |
| <i>Tetrahymena thermophila</i>                 | 24,725      | <a href="http://ciliate.org/index.php/">http://ciliate.org/index.php/</a>           | <i>Galdieria sulphuraria</i>           | 7,174       | <a href="http://www.ncbi.nlm.nih.gov/">http://www.ncbi.nlm.nih.gov/</a>                 |
| <i>Sterkiella histriomuscorum</i>              | 24,578      | <a href="http://www.ncbi.nlm.nih.gov/">http://www.ncbi.nlm.nih.gov/</a>             | Total:                                 | 21,770      |                                                                                         |
| Total:                                         | 88,824      |                                                                                     | <b>Viridiplantae (6)</b>               |             |                                                                                         |
| <b>Cryptophyta</b>                             |             |                                                                                     | <i>Arabidopsis thaliana</i>            | 35,378      | <a href="http://www.ncbi.nlm.nih.gov/">http://www.ncbi.nlm.nih.gov/</a>                 |
| <i>Guillardia theta</i> (genome + nucleomorph) | 25,504      | <a href="http://genome.jgi.doe.gov/">http://genome.jgi.doe.gov/</a>                 | <i>Sorghum bicolor</i>                 | 29448       | Phytozome v9.0                                                                          |
| <b>Euglenozoa (2)</b>                          |             |                                                                                     | <i>Physcomitrella patens</i>           | 35940       | <a href="http://www.ncbi.nlm.nih.gov/">http://www.ncbi.nlm.nih.gov/</a>                 |
| <i>Leishmania major</i>                        | 8,406       | <a href="http://tritrypdb.org/">http://tritrypdb.org/</a>                           | <i>Selaginella moellendorffii</i>      | 22,285      | Phytozome v9.0                                                                          |
| <i>Trypanosoma cruzi</i>                       | 10,847      | <a href="http://www.ncbi.nlm.nih.gov/">http://www.ncbi.nlm.nih.gov/</a>             | <i>Chlamydomonas reinhardtii</i>       | 14,413      | <a href="http://www.ncbi.nlm.nih.gov/">http://www.ncbi.nlm.nih.gov/</a>                 |
| Total:                                         | 19,253      |                                                                                     | <i>Ostreococcus tauri</i>              | 7,725       | <a href="http://genome.jgi-psf.org/">http://genome.jgi-psf.org/</a>                     |
| <b>Fungi and relatives (9)</b>                 |             |                                                                                     | Total:                                 | 145,189     |                                                                                         |
| <i>Magnaporthe grisea</i>                      | 11,054      | <a href="http://www.broadinstitute.org/">http://www.broadinstitute.org/</a>         | <b>Haptophyte</b>                      |             |                                                                                         |
| <i>Neurospora crassa</i>                       | 9,907       | <a href="http://www.broadinstitute.org/">http://www.broadinstitute.org/</a>         | <i>Emiliania huxleyi</i>               | 39,125      | <a href="http://genome.jgi-psf.org/">http://genome.jgi-psf.org/</a>                     |
| <i>Aspergillus fumigatus</i>                   | 9,888       | <a href="http://www.broadinstitute.org/">http://www.broadinstitute.org/</a>         | <b>Heterokonta (7)</b>                 |             |                                                                                         |
| <i>Ustilago maydis</i>                         | 6,522       | <a href="http://www.broadinstitute.org/">http://www.broadinstitute.org/</a>         | <i>Phaeodactylum tricornutum</i>       | 10,025      | <a href="http://genome.jgi-psf.org/">http://genome.jgi-psf.org/</a>                     |
| <i>Coprinopsis cinerea</i>                     | 13,342      | <a href="http://www.broadinstitute.org/">http://www.broadinstitute.org/</a>         | <i>Thalassiosira pseudonana</i>        | 11,390      | <a href="http://genome.jgi-psf.org/">http://genome.jgi-psf.org/</a>                     |
| <i>Rhizopus oryzae</i>                         | 17,459      | <a href="http://www.broadinstitute.org/">http://www.broadinstitute.org/</a>         | <i>Ectocarpus siliculosus</i>          | 16,589      | <a href="http://www.ncbi.nlm.nih.gov/">http://www.ncbi.nlm.nih.gov/</a>                 |
| <i>Antonospora locustae</i>                    | 2,606       | <a href="http://forest.mbl.edu/">http://forest.mbl.edu/</a>                         | <i>Aureococcus anophagefferens</i>     | 11,501      | <a href="http://genome.jgi-psf.org/">http://genome.jgi-psf.org/</a>                     |
| <i>Allomyces macrogynus</i>                    | 19,446      | <a href="http://www.broadinstitute.org/">http://www.broadinstitute.org/</a>         | <i>Blastocystis hominis</i>            | 6,020       | <a href="http://www.ncbi.nlm.nih.gov/">http://www.ncbi.nlm.nih.gov/</a>                 |
| <i>Batrachomyxium dendrobatidis</i>            | 8,818       | <a href="http://www.broadinstitute.org/">http://www.broadinstitute.org/</a>         | <i>Phytophthora infestans</i>          | 15,743      | <a href="ftp://ftp.ensemblgenomes.org/">ftp://ftp.ensemblgenomes.org/</a>               |
| Total:                                         | 99,042      |                                                                                     | <i>Pythium ultimum</i>                 | 15,322      | <a href="ftp://ftp.ensemblgenomes.org/">ftp://ftp.ensemblgenomes.org/</a>               |
| <b>Haptophyte</b>                              |             |                                                                                     | Total:                                 | 86,590      |                                                                                         |
| <i>Emiliania huxleyi</i>                       | 39,125      | <a href="http://genome.jgi-psf.org/">http://genome.jgi-psf.org/</a>                 |                                        |             |                                                                                         |
| <b>Heterokonta (7)</b>                         |             |                                                                                     |                                        |             |                                                                                         |
| <i>Phaeodactylum tricornutum</i>               | 10,025      | <a href="http://genome.jgi-psf.org/">http://genome.jgi-psf.org/</a>                 |                                        |             |                                                                                         |
| <i>Thalassiosira pseudonana</i>                | 11,390      | <a href="http://genome.jgi-psf.org/">http://genome.jgi-psf.org/</a>                 |                                        |             |                                                                                         |
| <i>Ectocarpus siliculosus</i>                  | 16,589      | <a href="http://www.ncbi.nlm.nih.gov/">http://www.ncbi.nlm.nih.gov/</a>             |                                        |             |                                                                                         |
| <i>Aureococcus anophagefferens</i>             | 11,501      | <a href="http://genome.jgi-psf.org/">http://genome.jgi-psf.org/</a>                 |                                        |             |                                                                                         |
| <i>Blastocystis hominis</i>                    | 6,020       | <a href="http://www.ncbi.nlm.nih.gov/">http://www.ncbi.nlm.nih.gov/</a>             |                                        |             |                                                                                         |
| <i>Phytophthora infestans</i>                  | 15,743      | <a href="ftp://ftp.ensemblgenomes.org/">ftp://ftp.ensemblgenomes.org/</a>           |                                        |             |                                                                                         |
| <i>Pythium ultimum</i>                         | 15,322      | <a href="ftp://ftp.ensemblgenomes.org/">ftp://ftp.ensemblgenomes.org/</a>           |                                        |             |                                                                                         |
| Total:                                         | 86,590      |                                                                                     |                                        |             |                                                                                         |

## Supplementary References

1. Suga, H. *et al.* The *Capsaspora* genome reveals a complex unicellular prehistory of animals. *Nat. Commun.* **4**, 2325 (2013).
